# Supplementary material for: Boosted photocatalytic performance on molecule/semiconductor hybrid materials: conversion of sunlight energy into hydrogen fuel
Source: Royal Society of Chemistry journal article supplement (doi:10.1039/d2nj05890a), 2023-01-01
Supplement: d2nj05890a1.pdf [file d2nj05890a1.pdf]

## Electronic Supplementary Information (ESI)

### **Boosted Photocatalytic Performance on Molecule/Semiconductor Hybrid Materials: Conversion of Sunlight Energy into Hydrogen Fuel**

Baotong Xu<sup>a</sup>, Xiangyang Li<sup>a</sup>, Ru Yang<sup>a</sup>, Wei Yao<sup>\*a</sup>, Enjun Gao<sup>\*a</sup>, Vladimir P. Fedin<sup>b</sup>

<sup>a</sup> *China-Russian Institute of Engineering Materials Chemistry, School of Chemical Engineering,  
University of Science and Technology Liaoning, Anshan, 114051, China;*

<sup>b</sup> *Nikolaev Institute of Inorganic Chemistry, Siberian Branch of the Russian Academy of Sciences,  
Novosibirsk, 630090, Russia*

\*Corresponding authors.

E-mail addresses: yaowei@ustl.edu.cn (W. Yao), enjungao@163.com. (E. Gao)

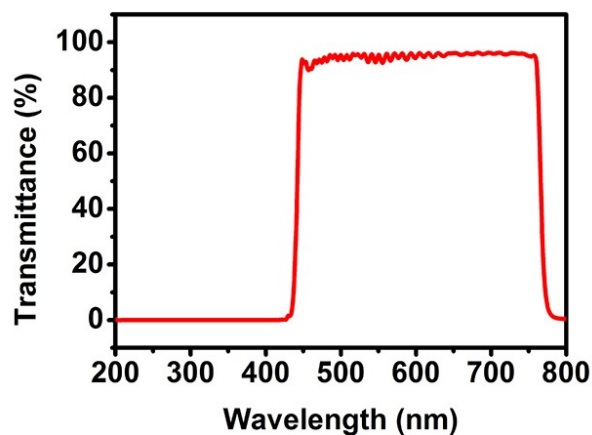

Fig. S1 Transmission spectra of a 420 nm cut-off filter used for photocatalytic measurements.

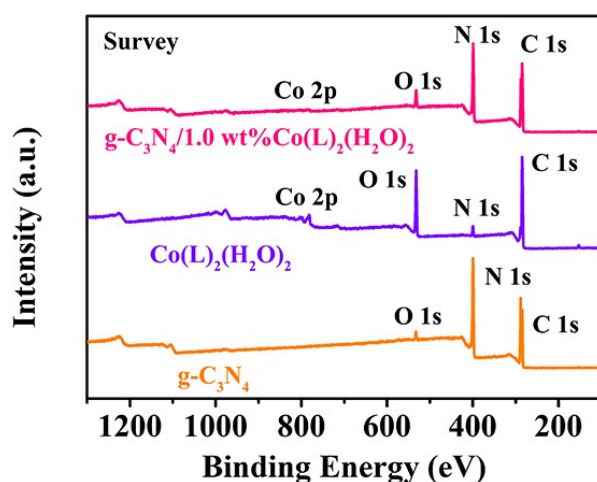

Fig. S2 XPS survey spectra of  $g\text{-C}_3\text{N}_4$ ,  $\text{Co}(\text{L})_2(\text{H}_2\text{O})_2$  and  $g\text{-C}_3\text{N}_4/1.0 \text{ wt}\% \text{Co}(\text{L})_2(\text{H}_2\text{O})_2$ .

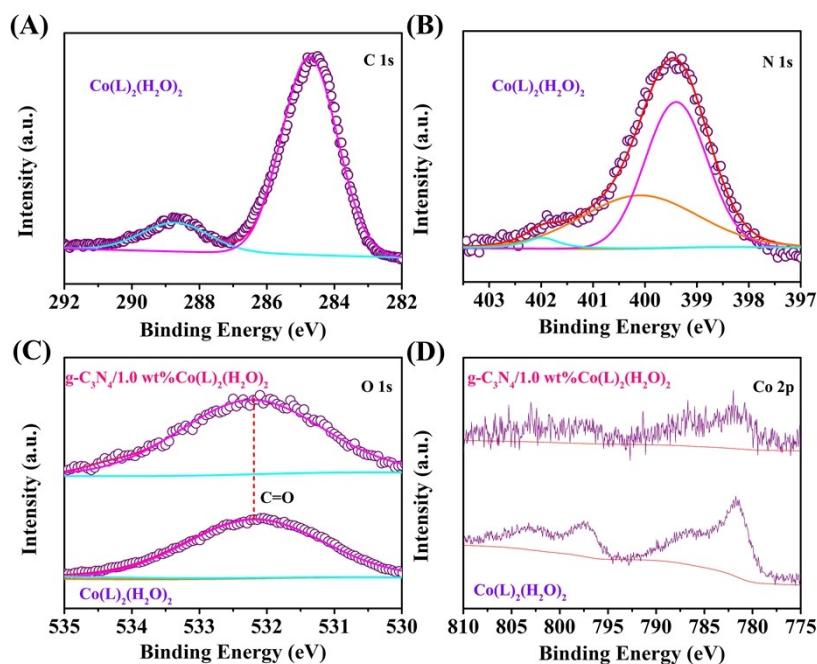

Fig. S3 (A-B) The high-resolution C 1s, N 1s in  $\text{Co}(\text{L})_2(\text{H}_2\text{O})_2$ ; (C-D) the high-resolution O 1s, Co 2p in  $\text{Co}(\text{L})_2(\text{H}_2\text{O})_2$ ,  $g\text{-C}_3\text{N}_4/1.0 \text{ wt}\% \text{Co}(\text{L})_2(\text{H}_2\text{O})_2$ .

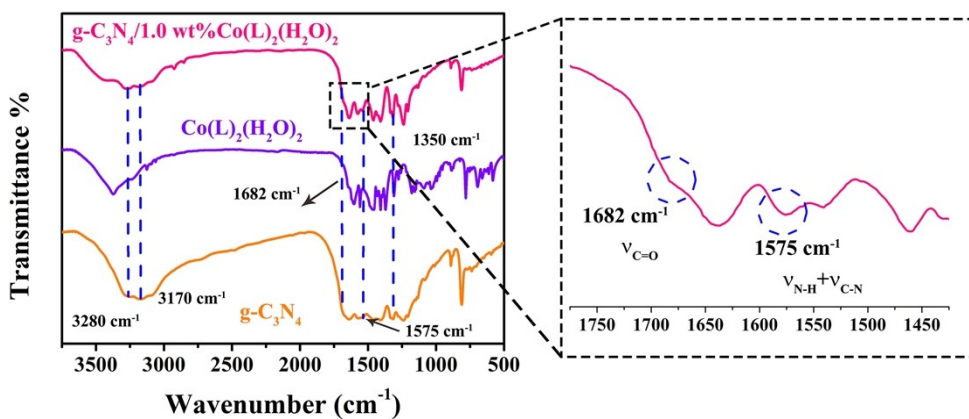

Fig. S4 FT-IR patterns of  $g\text{-C}_3\text{N}_4$ ,  $\text{Co(L)}_2(\text{H}_2\text{O})_2$  and  $g\text{-C}_3\text{N}_4/1.0 \text{ wt}\% \text{Co(L)}_2(\text{H}_2\text{O})_2$ .

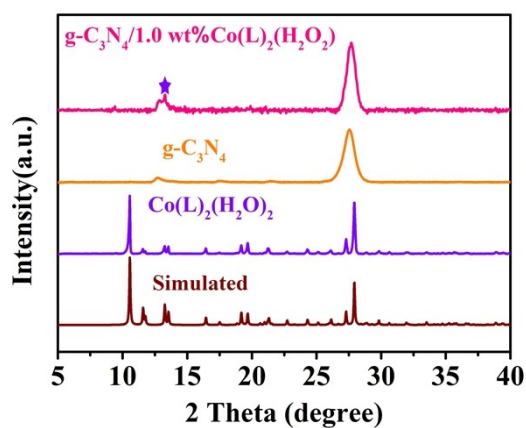

Fig. S5 XRD patterns of  $g\text{-C}_3\text{N}_4$ ,  $\text{Co(L)}_2(\text{H}_2\text{O})_2$  and  $g\text{-C}_3\text{N}_4/1.0 \text{ wt}\% \text{Co(L)}_2(\text{H}_2\text{O})_2$ .

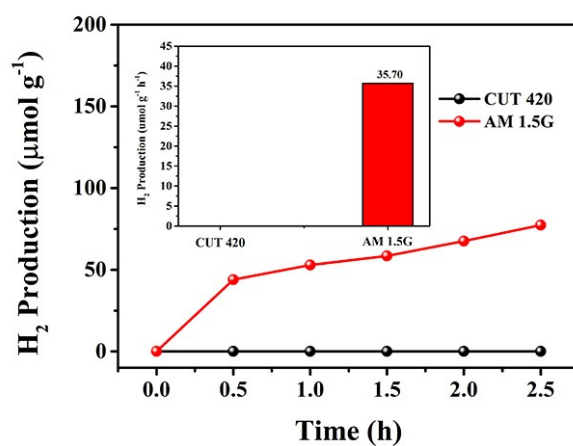

Fig S6. Photocatalytic  $\text{H}_2$  production of the  $\text{Co(L)}_2(\text{H}_2\text{O})_2$  under different filters.

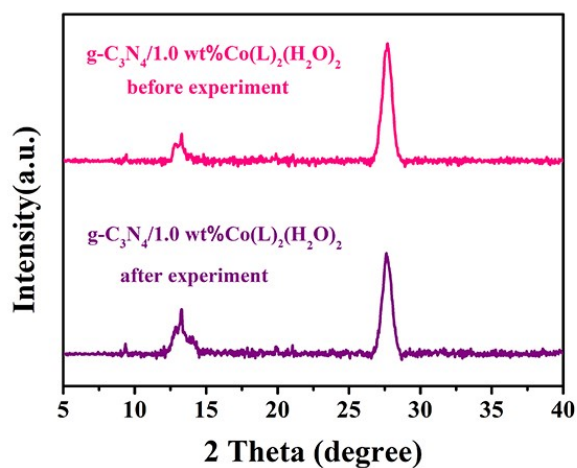

Fig. S7 XRD patterns of  $g\text{-C}_3\text{N}_4/1.0 \text{ wt}\% \text{Co(L)}_2(\text{H}_2\text{O})_2$  sample before and after experiment.

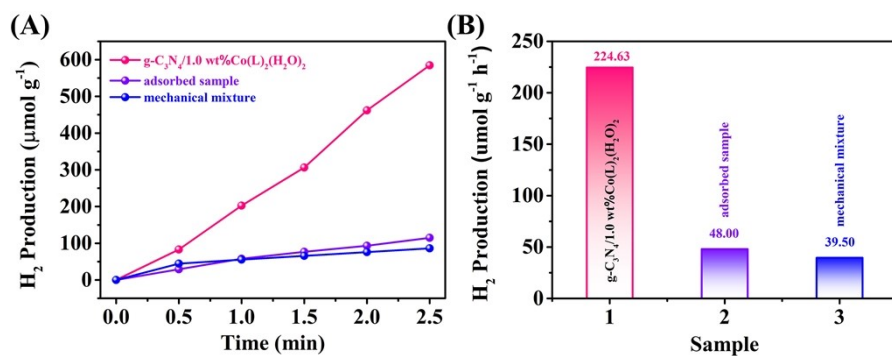

Fig S8. (A-B) Photocatalytic  $\text{H}_2$  production with  $g\text{-C}_3\text{N}_4/1.0 \text{ wt}\% \text{Co(L)}_2(\text{H}_2\text{O})_2$ , adsorbed sample and mechanical mixture of  $g\text{-C}_3\text{N}_4$  and  $\text{Co(L)}_2(\text{H}_2\text{O})_2$  under the same condition.

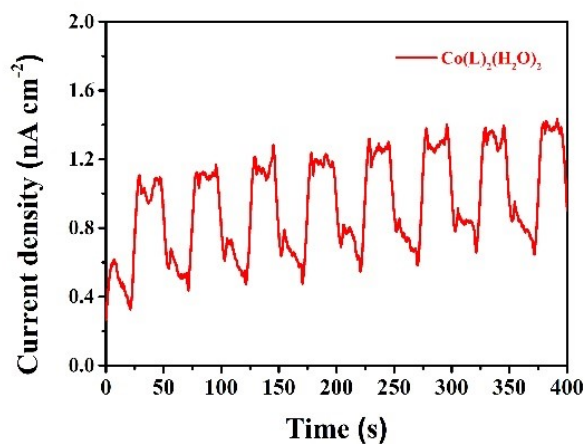

Fig. S9 Transient photocurrent density response of  $\text{Co(L)}_2(\text{H}_2\text{O})_2$  under visible light irradiation ( $\lambda > 420 \text{ nm}$ ).

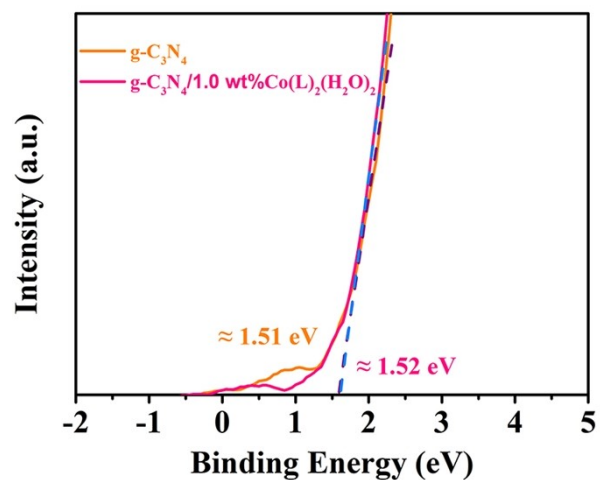

**Fig. S10** Valence-band XPS spectra of  $g\text{-C}_3\text{N}_4$  and  $g\text{-C}_3\text{N}_4/1.0 \text{ wt}\% \text{Co(L)}_2(\text{H}_2\text{O})_2$ .

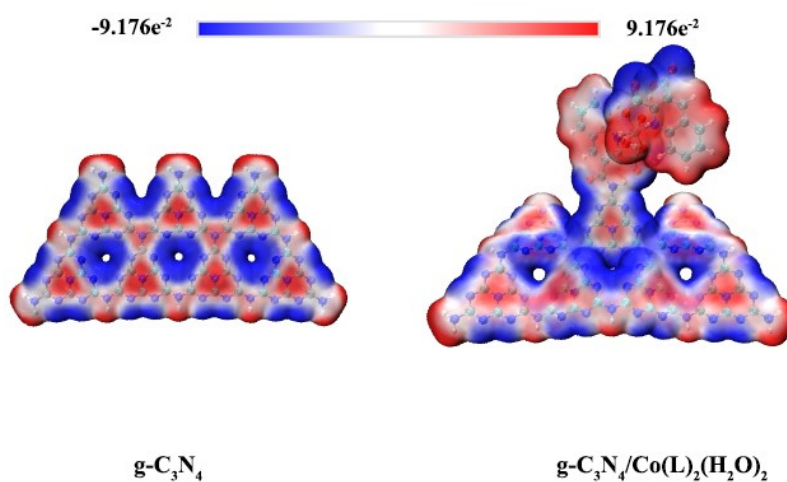

**Fig S11.** Electrostatic potential (ESP) map of  $g\text{-C}_3\text{N}_4$  and  $g\text{-C}_3\text{N}_4/\text{Co(L)}_2(\text{H}_2\text{O})_2$  model. The blue and red color surface corresponds to electron-rich and electron-poor, respectively.

**Table S1.** Details of reagents and corresponding amounts for preparation of g-C<sub>3</sub>N<sub>4</sub>/Co(L)<sub>2</sub>(H<sub>2</sub>O)<sub>2</sub>

| g-C <sub>3</sub> N <sub>4</sub> /x wt%Co(L) <sub>2</sub> (H <sub>2</sub> O) <sub>2</sub>   | g-C <sub>3</sub> N <sub>4</sub> | Co(NO <sub>3</sub> ) <sub>2</sub> ·6H <sub>2</sub> O | L                     | EDC                  | HOBt                 |
|--------------------------------------------------------------------------------------------|---------------------------------|------------------------------------------------------|-----------------------|----------------------|----------------------|
| g-C <sub>3</sub> N <sub>4</sub>                                                            | 300 mg                          | 0                                                    | 0                     | 0                    | 0                    |
| g-C <sub>3</sub> N <sub>4</sub> /0.5 wt%Co(L) <sub>2</sub> (H <sub>2</sub> O) <sub>2</sub> | 298.5 mg                        | 4 μmol<br>1.164 mg                                   | 4 μmol,<br>0.868 mg   | 8 μmol,<br>1.242 mg  | 8 μmol,<br>1.081 mg  |
| g-C <sub>3</sub> N <sub>4</sub> /1.0 wt%Co(L) <sub>2</sub> (H <sub>2</sub> O) <sub>2</sub> | 297 mg                          | 8 μmol,<br>2.328 mg                                  | 8 μmol,<br>1.737 mg   | 16 μmol,<br>2.484 mg | 16 μmol,<br>2.162 mg |
| g-C <sub>3</sub> N <sub>4</sub> /2.0 wt%Co(L) <sub>2</sub> (H <sub>2</sub> O) <sub>2</sub> | 294 mg                          | 16 μmol,<br>4.657 mg                                 | 16 μmol,<br>3.475 mg  | 32 μmol,<br>4.968 mg | 32 μmol,<br>4.324 mg |
| g-C <sub>3</sub> N <sub>4</sub> /3.0 wt%Co(L) <sub>2</sub> (H <sub>2</sub> O) <sub>2</sub> | 291 mg                          | 24 μmol,<br>6.985 mg                                 | 24 μmol,<br>5.212 mg  | 48 μmol,<br>7.452 mg | 48 μmol,<br>6.486 mg |
| Co(L) <sub>2</sub> (H <sub>2</sub> O) <sub>2</sub>                                         | 0                               | 0.8 mmol,<br>232.9 mg                                | 0.8 mmol,<br>217.8 mg | 0                    | 0                    |

**Table. S2** Cobalt elemental contents in g-C<sub>3</sub>N<sub>4</sub>/1.0 wt%Co(L)<sub>2</sub>(H<sub>2</sub>O)<sub>2</sub> by ICP-OES.

| Sample                                                                                     | Cobalt dosage (wt%) | Cobalt contents (wt%) |
|--------------------------------------------------------------------------------------------|---------------------|-----------------------|
| g-C <sub>3</sub> N <sub>4</sub> /1.0 wt%Co(L) <sub>2</sub> (H <sub>2</sub> O) <sub>2</sub> | 0.78                | 0.15                  |

**Table S3:** The comparison of the hydrogen evolution rates between this system and other similar reported work

| Photocatalysts                                                                           | Dosage<br>(mg) | Light source                                                 | Sacrificial<br>agents | H <sub>2</sub> evolution<br>rate ( $\mu\text{mol}\cdot\text{h}^{-1}$ ) | Ref.         |
|------------------------------------------------------------------------------------------|----------------|--------------------------------------------------------------|-----------------------|------------------------------------------------------------------------|--------------|
| Co(dcbpy) <sub>2</sub> (NCS) <sub>2</sub> /<br>CQDs/CN                                   | 50             | 300 W Xe lamp<br>( $\lambda > 420$ nm)                       | TEOA                  | 295.9                                                                  | 1            |
| Co@NC/g-C <sub>3</sub> N <sub>4</sub>                                                    | 25             | 300 W Xe lamp<br>(simulated sunlight)                        | TEOA                  | 161                                                                    | 2            |
| Co-mCN                                                                                   | 10             | White light-emitting<br>diode ( $420 < \lambda < 700$<br>nm) | -                     | 182                                                                    | 3            |
| [Co(bpy) <sub>3</sub> <sup>2+</sup> ]/BINA-<br>PCN                                       | 50             | 300 W Xe lamp<br>( $\lambda > 420$ nm)                       | TEOA                  | 162                                                                    | 4            |
| Co-CN<br>(3 wt% Pt)                                                                      | 50             | 300 W Xe lamp<br>( $\lambda > 420$ nm)                       | TEOA                  | 560                                                                    | 5            |
| CoP/g-C <sub>3</sub> N <sub>4</sub>                                                      | 2              | 300 W Xe lamp<br>( $\lambda = 400$ nm)                       | TEOA                  | 195                                                                    | 6            |
| 10%Co/CAN<br>(3 wt% Pt)                                                                  | 25             | 300 W Xe lamp<br>( $\lambda > 420$ nm)                       | TEOA                  | 472.2                                                                  | 7            |
| CNNS-Co (1.0%)<br>(3 wt% Pt)                                                             | 50             | 300 W Xe lamp<br>( $\lambda > 420$ nm)                       | TEOA                  | 808.92                                                                 | 8            |
| 35% Co <sub>3</sub> (PO <sub>4</sub> ) <sub>2</sub> /g-<br>C <sub>3</sub> N <sub>4</sub> | 50             | Xe lamp<br>( $\lambda > 400$ nm)                             | -                     | 375.6                                                                  | 9            |
| CoS <sub>X</sub> /g-C <sub>3</sub> N <sub>4</sub>                                        | 50             | 350 W Xe lamp<br>( $\lambda > 400$ nm)                       | TEOA                  | 629                                                                    | 10           |
| g-<br>C <sub>3</sub> N <sub>4</sub> /Co(L) <sub>2</sub> (H <sub>2</sub> O) <sub>2</sub>  | 50             | 300 W Xe lamp<br>( $\lambda > 420$ nm)                       | TEOA                  | 224.6                                                                  | This<br>work |

**Table. S4** Theoretical bandgap, HOMO, LUMO and  $E_{VB}$  of  $g\text{-C}_3\text{N}_4$  and  $g\text{-C}_3\text{N}_4/\text{Co}(\text{L})_2(\text{H}_2\text{O})_2$  according to calculation results of constructed models.

| Model                                                                | HOMO (eV) | LUMO (eV) | Bandgap (eV) | $E_{VB}$ (eV) |
|----------------------------------------------------------------------|-----------|-----------|--------------|---------------|
| $g\text{-C}_3\text{N}_4$                                             | -6.01     | -3.34     | 2.67         | 1.51          |
| $g\text{-C}_3\text{N}_4/\text{Co}(\text{L})_2(\text{H}_2\text{O})_2$ | -6.02     | -4.04     | 1.98         | 1.52          |



## Reference

1. Y. Zhang and W. D. Zhang, *Carbon*, 2019, **145**, 488-500
2. Y. Li, S. Zhu, X. Kong, Y. Liang and Z. Cui, *Environmental Research*, 2021, **197**, 111002.
3. B. Yd, Z. A. Cheng, A. Mz, A. Yf, A. Hw, C. Cs, H. A. Hui, L. A. Yang and A. Zk, *Applied Surface Science*, 2020, **509**, 144706.
4. Z. Pan, P. Niu, M. Liu, G. Zhang and X. Wang, *ChemSusChem*, 2020, **13**, 888-892.
5. P. W. Chen, K. Li, Y. X. Yu and W. D. Zhang, *Applied Surface Science*, 2017, **392**, 608-615.
6. Z. Sun, M. Zhu, X. Lv, Y. Liu, C. Shi, Y. Dai, A. Wang and T. Majima, *Applied Catalysis B: Environmental*, 2019, **246**, 330-336.
7. T. A. Zhen, Y. A. Xi, A. Yc, H. A. Hao, H. Jie and A. Bw, *International Journal of Hydrogen Energy*, 2020, **45**, 24792-24806.
8. Y. A. Xi, T. A. Zhen, A. Yc, H. A. Hao, H. Jie and A. Bw, *Journal of Alloys and Compounds*, 2021, **859**, 157754.
9. A. Ws, C. Ml, C. Xh, C. Hr, Y. A. Chao and G. B. Feng, *Chemical Engineering Journal*, 2020, **382**, 122960.
10. J. Fu, C. Bie, B. Cheng, C. Jiang and J. Yu, *Acs Sustainable Chemistry & Engineering*, 2018, **6**, 2767-2779.
